# Supplementary material for: Comparisons of parallel potential biomarkers of 1H-MRS-measured hepatic lipid content in patients with non-alcoholic fatty liver disease
Source: PubMed Central journal article supplement (PMC4832180; doi:10.1038/srep24031), 2016-04-15
Supplement: srep24031-s1.pdf [file srep24031-s1.pdf]

# Comparisons of parallel potential biomarkers of $^1\text{H}$ -MRS-measured hepatic lipid content in patients with non-alcoholic fatty liver disease

Kai-Lun Shih<sup>1†</sup>, Wei-Wen Su<sup>1†</sup>, Chia-Chu Chang<sup>2,3</sup>, Chew-Teng Kor<sup>4</sup>, Chen-Te Chou<sup>5</sup>,  
Ting-Yu Chen<sup>6</sup>, and Hung-Ming Wu<sup>6,7,8\*</sup>

<sup>1</sup> Department of Gastroenterology, Changhua Christian Hospital, Changhua, Taiwan

<sup>2</sup> Department of Nephrology, Changhua Christian Hospital, Changhua, Taiwan

<sup>3</sup> School of Medicine, Chung-Shan Medical University, Taichung, Taiwan

<sup>4</sup> Internal Medicine Research Center, Changhua Christian Hospital, Changhua, Taiwan

<sup>5</sup> Department of Medical Imaging, Changhua Christian Hospital, Changhua, Taiwan

<sup>6</sup> Inflammation Research & Drug Development Center, Changhua Christian Hospital,  
Changhua, Taiwan

<sup>7</sup> Department of Neurology, Changhua Christian Hospital, Changhua, Taiwan

<sup>8</sup> Graduate Institute of Acupuncture Science, China Medical University, Taichung, Taiwan

† These two authors contributed equally to this work.

*\* Corresponding author and person to whom reprint requests should be addressed:*

Hung-Ming Wu, MD, PHD

Inflammation Research & Drug Development Center

Changhua Christian Hospital

No. 135 Nan-Siau Street, Changhua 500, Taiwan

Tel: +886-4-7238595 ext. 4237

Fax: +886-4-7232942

E-mail: [18288@cch.org.tw](mailto:18288@cch.org.tw)

Supplementary Figure 1

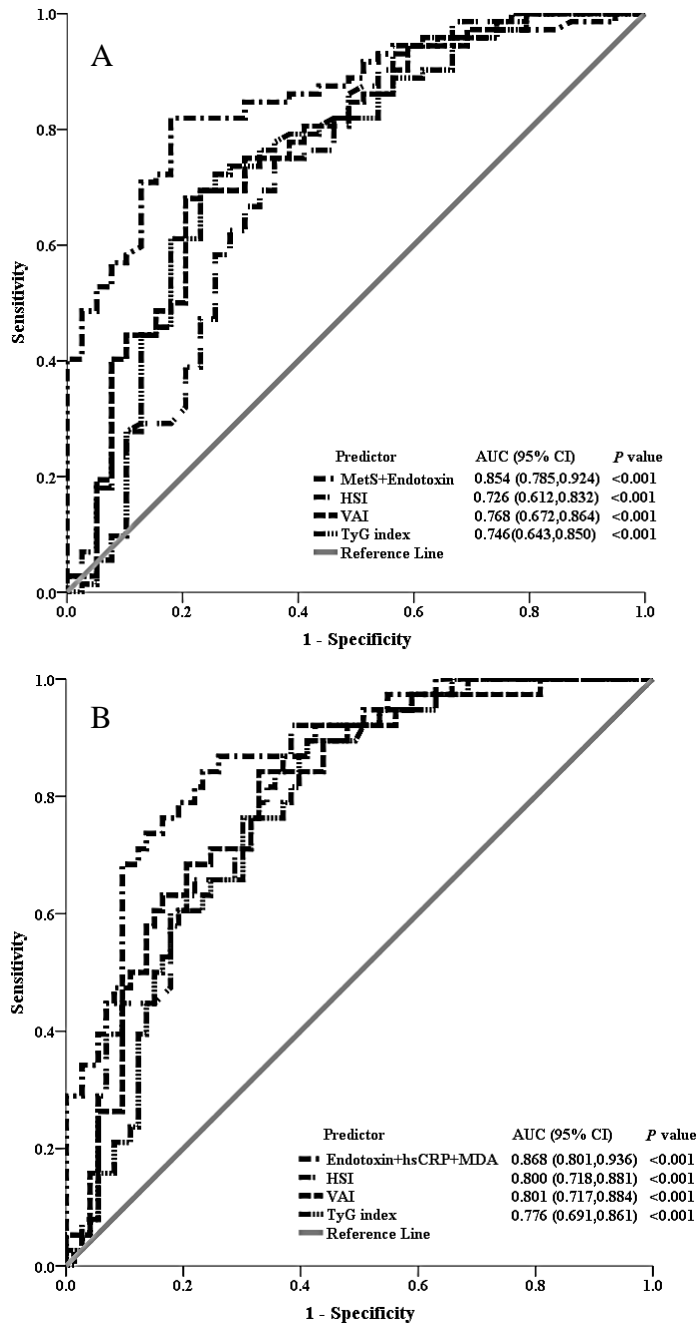

Supplementary Figure 1. Comparisons of ROC curves (AUCs) for HSI, VAI, TyG index, and the model in the present study. (A) AUCs of these four scoring systems for overall  $^1\text{H}$ -MRS-measured NAFLD, and (B) for  $^1\text{H}$ -MRS-measured NAFLD with liver injury. HSI, hepatic steatosis index includes ALT/AST, BMI, gender, and diabetes; TyG index, triglyceride x glucose index; VAI, visceral adiposity index includes waist circumference, triglyceride, HDL-C, and BMI.
